# Supplementary material
Source: Springer Nature journal article supplement (https://www.springermedizin.de/resource/supplementary/12974_2010_273_MOESM2_ESM.pdf/9601138)

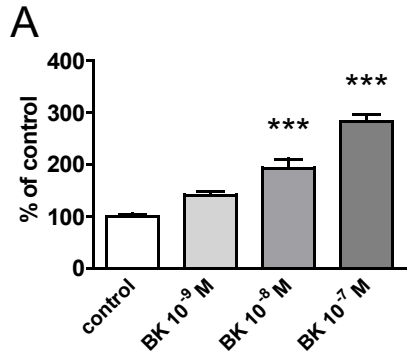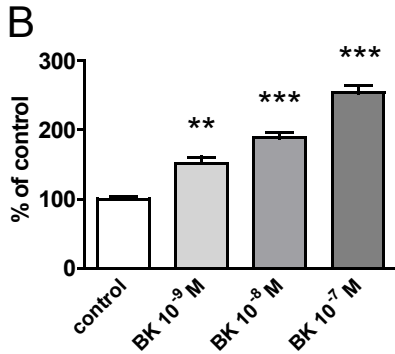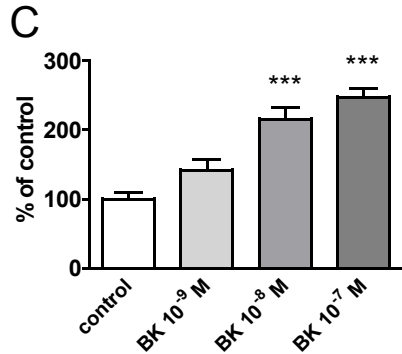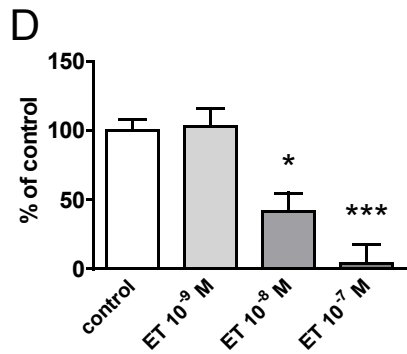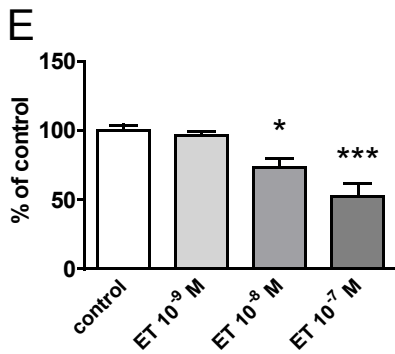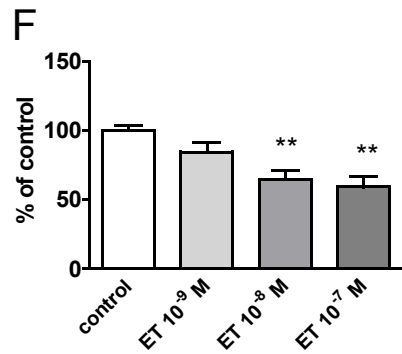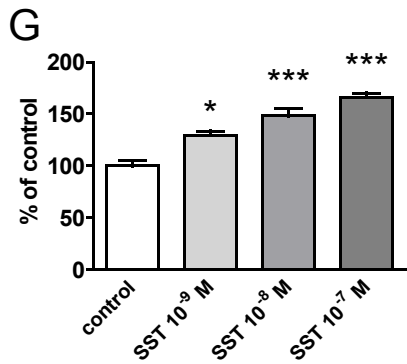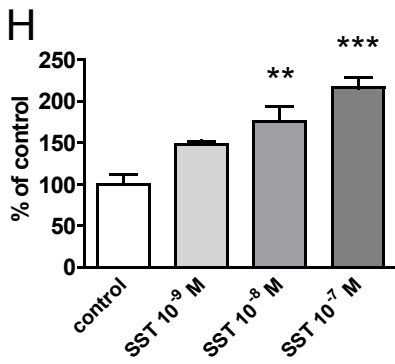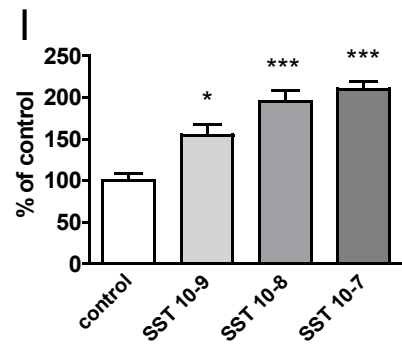

Supplement: MOESM2 [file 9601138]
